# Supplementary material
Source: PubMed Central journal article supplement (PMC1626374)
Supplement: rsbl20050376s01.pdf [file rsbl20050376s01.pdf]

# ELECTRONIC APPENDIX

This is the Electronic Appendix to the article

**Extrapair mating between relatives in the barn swallow:  
a role for kin selection?**

by

Oddmund Kleven, Frode Jacobsen, Raleigh J. Robertson & Jan T. Lifjeld

*Biol. Lett.* ([doi:10.1098/rsbl.2005.0376](https://doi.org/10.1098/rsbl.2005.0376))

Electronic appendices are refereed with the text; however, no attempt is made to impose a uniform editorial style on the electronic appendices.

Supplementary data

**Table 1.** PCR conditions and polymorphism among microsatellite loci used for genetic analyses in the North American barn swallow ( $n = 375$  adults)

| Locus (reference)                      | PCR conditions (temperatures in degrees Celcius)                                    | $n_a$ | Heterozygosity |           |       | $NA_{obs}$ |
|----------------------------------------|-------------------------------------------------------------------------------------|-------|----------------|-----------|-------|------------|
|                                        |                                                                                     |       | $H_{obs}$      | $H_{exp}$ | $P_e$ |            |
| Aar4 (Hansson <i>et al.</i> 2000)      | 94(5min), [94(30s)-48(30s)-72(30s)] 29cycles, 72(7min), 4(5min)                     | 13    | 0.56           | 0.53      | 0.34  | 0.003      |
| Escu6 (Hanotte <i>et al.</i> 1994)     | 94(5min), [94(30s)-50(30s)-72(30s)] 29cycles, 72(7min), 4(5min)                     | 20    | 0.86           | 0.89      | 0.77  | 0.005      |
| HrU5 (Primmer <i>et al.</i> 1995)      | 94(5min), 58(1min), 72(1min), [94(30s)-58(30s)-72(40s)] 32cycles, 72(7min), 4(5min) | 21    | 0.92           | 0.90      | 0.81  | 0.001      |
| HrU6 (Primmer <i>et al.</i> 1995)      | 94(5min), 63(1min), 72(1min), [94(30s)-63(30s)-72(40s)] 29cycles, 72(7min), 4(5min) | 99    | 0.95           | 0.96      | 0.93  | 0.003      |
| HrU7 (Primmer <i>et al.</i> 1995)      | 94(5min), 63(1min), 72(1min), [94(30s)-63(30s)-72(40s)] 29cycles, 72(7min), 4(5min) | 5     | 0.50           | 0.50      | 0.26  | 0.005      |
| HrU10 (Primmer <i>et al.</i> 1996)     | 94(5min), 65(1min), 72(1min), [94(30s)-60(30s)-72(40s)] 35cycles, 72(7min), 4(5min) | 127   | 0.96           | 0.98      | 0.96  | 0.009      |
| Ltr6 (McDonald & Potts 1994)           | 94(5min), [94(30s)-55(30s)-72(30s)] 29cycles, 72(7min), 4(5min)                     | 8     | 0.64           | 0.67      | 0.44  | 0.003      |
| Phtr2 (Fridolfsson <i>et al.</i> 1997) | 95 (5min), [95(30s), 50(30s), 72(30s)] 35cycles 72(7min), 4(5min)                   | 14    | 0.75           | 0.76      | 0.57  | 0.017      |
| POCC6 (Bensch <i>et al.</i> 1997)      | 94(5min), [94(30s)-52(30s)-72(30s)] 29cycles, 72(7min), 4(5min)                     | 16    | 0.86           | 0.86      | 0.73  | 0.000      |
|                                        |                                                                                     |       | Total          | >0.999    |       |            |

Methods

DNA was extracted from blood and tissue samples using the QIAamp® DNA Blood Kit and DNeasy® Tissue Kit (QIAGEN, Venlo, The Netherlands). The microsatellite markers were amplified by optimised polymerase chain reaction (PCR). PCR was performed in a GeneAmp 9700 Thermocycler (Applied Biosystems, Foster City, U.S.A.). We used fluorescently labelled primers and the PCR products were run on an ABI 3100 sequencer (Applied Biosystems). Allele sizes were determined with GeneMapper v3.0 (Applied Biosystems), and marker polymorphism ( $n_a$  = number of alleles;  $H_{obs}$  = observed heterozygosity;  $H_{exp}$  = expected heterozygosity;  $P_e$  = probability of exclusion with one known parent) was calculated by using CERVUS (Marshall *et al.* 1998). Non-amplifying (i.e. null-) alleles ( $NA_{obs}$  = observed frequency of null-alleles) were detected on eight loci at low levels. Significant deviations from Hardy-Weinberg expectation (Chakraborty *et al.* 1992) were found only for two loci (HrU6 and Phtr2), and most individuals (17/18 and 79/94) that were homozygous at these two loci had common (i.e. among the 15% most frequent) alleles. This suggests that the number of potentially undetected null-alleles is insignificant and should not be a confounding factor in our genetic analyses.

Initially, we used CERVUS (Marshall *et al.* 1998) to obtain a list of candidate parents for each young. Nestlings were defined as withinpair young if they matched their parents completely ( $n = 603$ ) or had one mismatching allele ( $n = 50$ ). In four cases, a nestling had a genotype that made a complete match with two different males in the colony (i.e. probably first-order relatives). As the social father was involved in all four cases he was conservatively assigned as the genetic father. We defined nestlings with two or more allelic mismatches with the social male as extrapair young ( $n = 264$ ). Eight offspring had one mismatch with their assigned extra-pair father. In seven of these cases, the males sired other

offspring in the nest and so were assigned as genetic fathers, while in a single case a male was assigned genetic father due to the low probability of false inclusion (Jeffreys *et al.* 1992) ( $= 5.4 \times 10^{-08}$ , excluding the mismatched locus). Mismatches were maternally biased and appeared at only two loci, for which high mutation rates have previously been reported (Brohede *et al.* 2002). All offspring ( $n = 917$ ) were the true offspring of the female at the nest, whereas extrapair paternity encompassed 101 of 210 broods and 264 of 917 young.

## References

- Bensch, S., Price, T. & Kohn, J. 1997 Isolation and characterization of microsatellite loci in a *Phylloscopus* warbler. *Mol. Ecol.* **6**, 91-92.
- Brohede, J., Primmer, C. R., Møller, A. P. & Ellegren, H. 2002 Heterogeneity in the rate and pattern of germline mutation at individual microsatellite loci. *Nucl. Acids Res.* **30**, 1997-2003.
- Chakraborty, R., Deandrade, M., Daiger, S. P. & Budowle, B. 1992 Apparent heterozygote deficiencies observed in DNA typing data and their implications in forensic applications. *Ann. Hum. Genet.* **56**, 45-57.
- Fridolfsson, A. K., Gyllensten, U. B. & Jakobsson, S. 1997 Microsatellite markers for paternity testing in the willow warbler *Phylloscopus trochilus*: high frequency of extra-pair young in an island population. *Hereditas* **126**, 127-132.
- Hanotte, O., Zanon, C., Pugh, A., Greig, C., Dixon, A. & Burke, T. 1994 Isolation and characterization of microsatellite loci in a passerine bird: the reed bunting *Emberiza schoeniclus*. *Mol. Ecol.* **3**, 529-530.
- Hansson, B., Bensch, S., Hasselquist, D., Lillandt, B. G., Wennerberg, L. & von Schantz, T. 2000 Increase of genetic variation over time in a recently founded population of great reed warblers (*Acrocephalus arundinaceus*) revealed by microsatellites and DNA fingerprinting. *Mol. Ecol.* **9**, 1529-1538.
- Jeffreys, A. J., Allen, M. J., Hagelberg, E. & Sonnberg, A. 1992 Identification of the skeletal remains of Josef Mengele by DNA analysis. *Forensic Sci. Int.* **56**, 65-76.
- Marshall, T. C., Slate, J., Kruuk, L. E. B. & Pemberton, J. M. 1998 Statistical confidence for likelihood-based paternity inference in natural populations. *Mol. Ecol.* **7**, 639-655.
- McDonald, D. B. & Potts, W. K. 1994 Cooperative display and relatedness among males in a lek-mating bird. *Science* **266**, 1030-1032.
- Primmer, C. R., Møller, A. P. & Ellegren, H. 1995 Resolving genetic relationships with microsatellite markers: a parentage testing system for the swallow *Hirundo rustica*. *Mol. Ecol.* **4**, 493-498.
- Primmer, C. R., Møller, A. P. & Ellegren, H. 1996 New microsatellites from the pied flycatcher *Ficedula hypoleuca* and the swallow *Hirundo rustica* genomes. *Hereditas* **124**, 281-283.
